# Supplementary material for: Pontibacter rubellus sp. nov., and Pontibacter situs sp. nov. bacteria isolated from soil
Source: Research Square preprint supplement (doi:10.21203/rs.3.rs-582338/v1), 2021-09-21
Supplement: Supplementary file 1 [file e138def02fa14e95d0832944.docx]

**Fig. S1.** The genomic phylogenetic tree based on orthologous protein and gene sequences derived using UBCG tool.

**
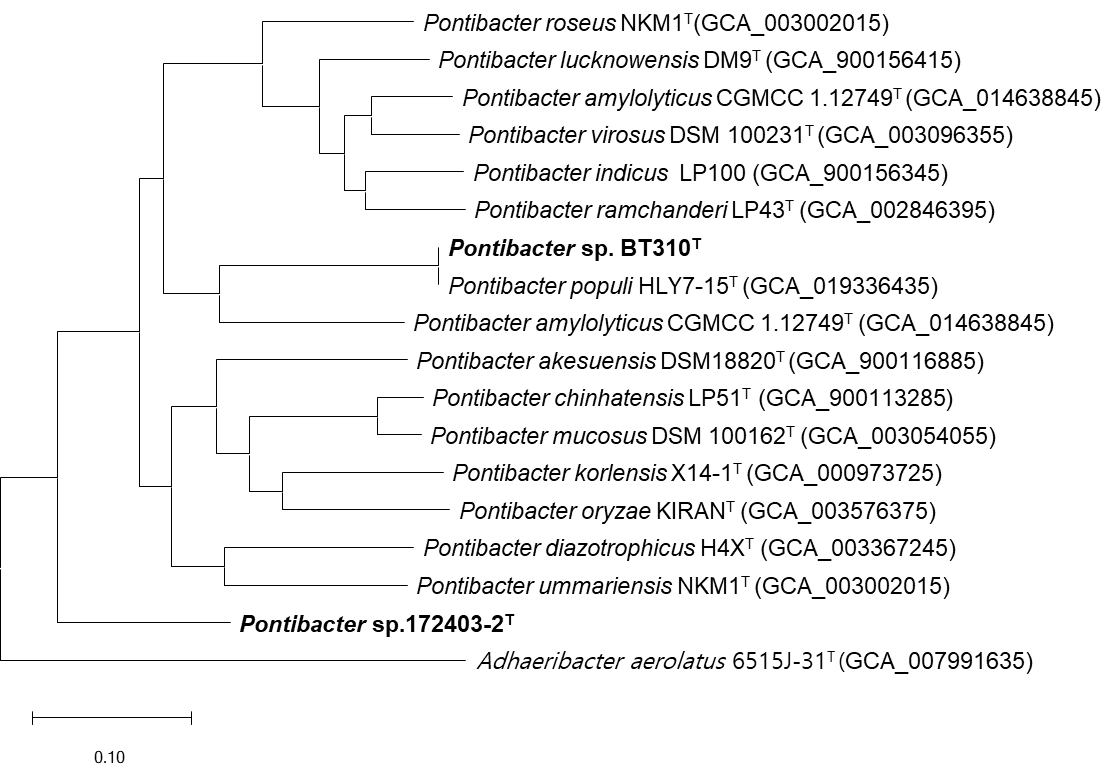
**

**Fig. S2.** Polar lipid profile of strain 172403-2T, after two dimensional chromatography.

(a), total lipids; (b), phospholipids; (c), aminolipids; (d), glycolipids.

Abbreviations: L, lipid; PL, phospholipid; APL, aminophospholipid; PE, phosphatidylethanolamine; AL, aminolipid; GL, glycolipid.


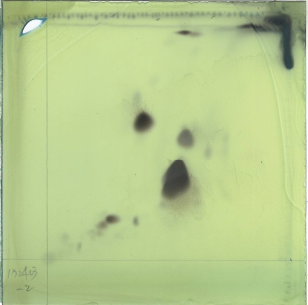


**L1**

**L2**

**AL**

**PE**

**GL2**

**GL1**

**APL**


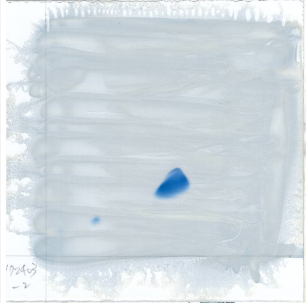


**PE**

**APL**


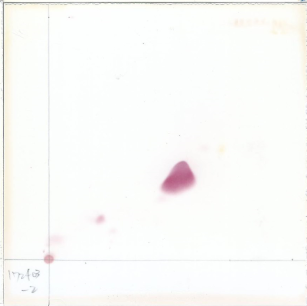


**AL**

**PE**

**APL**


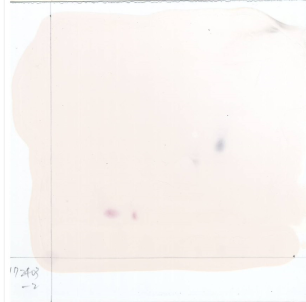


**GL2**

**GL1**

(a)

(b)

(c)

(d)

**Fig. S3.** Polar lipid profile of strain BT310T, after two-dimensional chromatography.

(a), total lipids; (b), phospholipids; (c), aminolipids; (d), glycolipids.

Abbreviations: L, lipid; PL, phospholipid; APL, aminophospholipid; PE, phosphatidylethanolamine; AL, aminolipid; GL, glycolipid.


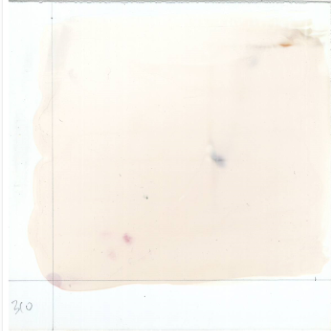

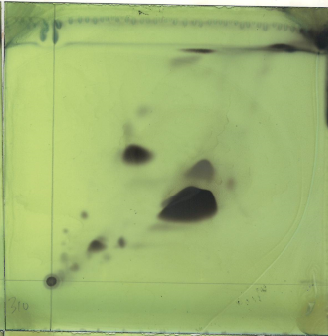


**L1**

**L2**

**PL1**

**L3**

**L4**

**PE**

**L5**

**GL**

**APL**

**L6**

**PL2**

**L7**

**AL**


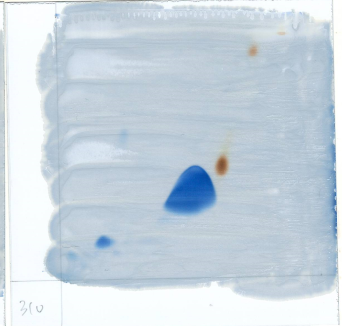


**PL1**

**PE**

**APL**

**PL2**


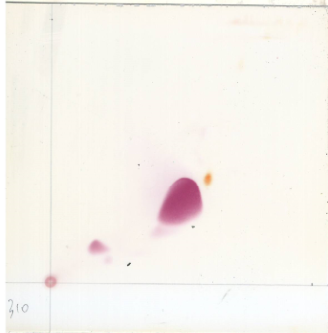


**PE**

**APL**

**AL**

(a)

(b)

(c)

(d)
